# Supplementary material
Source: PubMed Central journal article supplement (PMC2911338)

Supplementary Fig. S1. *A.* Comparison of amino acid sequences of mammalian TCR $\alpha$  and TCR $\beta$  chains. *B.* Cell lysates from HeLa cells transfected with plasmids encoding WT or SS-AA mutant TCR $\alpha$ -HA were left untreated or digested with Endo H or PNGase F before immunoblotting with anti-HA monoclonal antibody. Molecular mass markers (in kilodaltons) are indicated on the right. *C-H.* HeLa cells transfected with plasmids encoding WT or SS-AA mutant TCR $\alpha$ -HA were fixed, permeabilized and immunostained with rabbit polyclonal anti-HA (green channel; C & F) and mouse monoclonal anti-calnexin antibodies (red channel; D & G), followed by Alexa Fluor 488 goat anti-rabbit IgG and Alexa Fluor 555 goat anti-mouse IgG antibodies. Cells were visualized by confocal fluorescence microscopy. Bars, 10  $\mu$ m. *I.* A postnuclear supernatant (PS) of HeLa cells transfected with WT or SS-AA mutant TCR $\alpha$ -HA was separated into cytosolic (Cyt) and membrane (Memb) fractions by ultracentrifugation at 105,000  $\times g$  for 1 h. The membrane fraction was treated with 0.1 M Na<sub>2</sub>CO<sub>3</sub>, pH 11.3 (Na<sub>2</sub>CO<sub>3</sub>) or 0.5% (v/v) Triton X-100 (Tx100) for 1 h at 4 °C. After ultracentrifugation at 105,000  $\times g$  for 1 h, supernatants were collected. All fractions were analyzed by SDS-PAGE and immunoblotting with anti-HA monoclonal antibody.

# Supplemental Figure 1

**A**

|              | Transmembrane →             | ← Cytosolic |             | Transmembrane →               | ← Cytosolic |
|--------------|-----------------------------|-------------|-------------|-------------------------------|-------------|
| TCR $\alpha$ | NLSVIGFRILLLKVAGFNLLMTLRWSS |             | TCR $\beta$ | ILLGKATLYAVLVSALVLMAMVKKKDSRG |             |
| Human        | NLSVIGFRILLLKVAGFNLLMTLRWSS |             | Human       | ILLGKATLYAVLVSALVLMAMVKKKDSRG |             |
| Mouse        | NLSVMGLRILLLKVAGFNLLMTLRWSS |             | Mouse       | ILLGKATLYAVLVSGLVLMAMVKKKNS-- |             |
| Rat          | NLSVMGLRILLLKVAGFNLLMTLRWSS |             | Rat         | ILIGKATLYAVLVSTLVVMAMVKKKSS-- |             |
| Rabbit       | NLSVIGLRILLLKVAGFNLLMTLRWSS |             | Rabbit      | ILLGKATLYAVLVSALVLMAMVKKKNP-- |             |
| Pig          | NLSVMGFRILLKMGFNLLMTLRWSS   |             | Pig         | ILLGKATLYAVLVSALVLMATVKKKDS-- |             |
| Sheep        | NLSVTVFRILLLKVGFNLLMTLRWSS  |             | Sheep       | ILLGKATLYAVLVSALVLMAMVKKKDS-- |             |

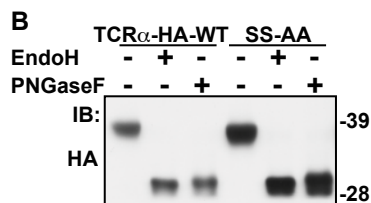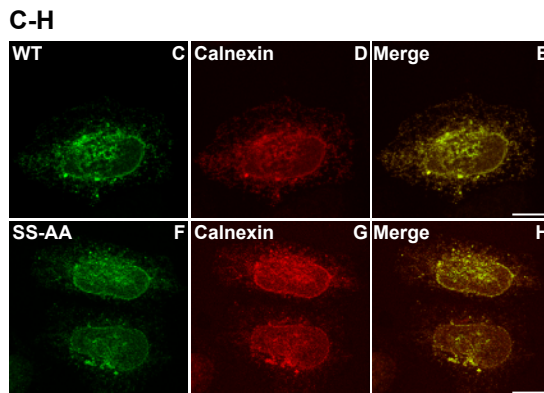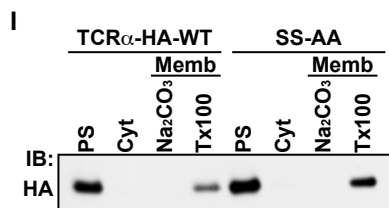

Supplement: supp_M110.127936_jbc.M110.127936-1.pdf [file supp_M110.127936_jbc.M110.127936-1.pdf]
